# Supplementary material for: The role of the ER stress-response protein PERK in rhodopsin retinitis pigmentosa
Source: PubMed Central journal article supplement (PMC5868081; doi:10.1093/hmg/ddx370), 2017-09-27
Supplement: ddx370_supplementary_material.pdf [file ddx370_supplementary_material.pdf]

## Supplementary material

### The role of the ER stress response protein PERK in rhodopsin retinitis pigmentosa Athanasίου et al

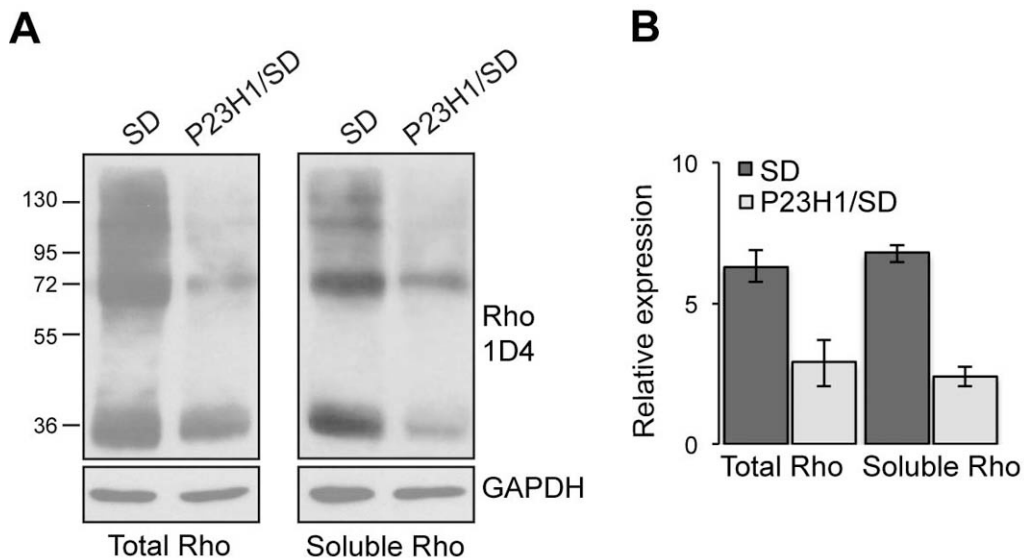

**Figure S1. Rhodopsin expression levels in P23H-1 rat retina.** (A) Immunoblot showing total and soluble rhodopsin levels in control SD rat retina and P23H-1 retina at P36. Retinal lysates were immunoblotted with the 1D4 antibody against rhodopsin. GAPDH was used as a loading control. The position of molecular weight markers is indicated on the left in kDa. (B) quantification of total and soluble rhodopsin levels. Densitometric analysis was used to calculate the levels of total and soluble rhodopsin. Values are mean  $\pm$  SEM  $n \geq 3$ .

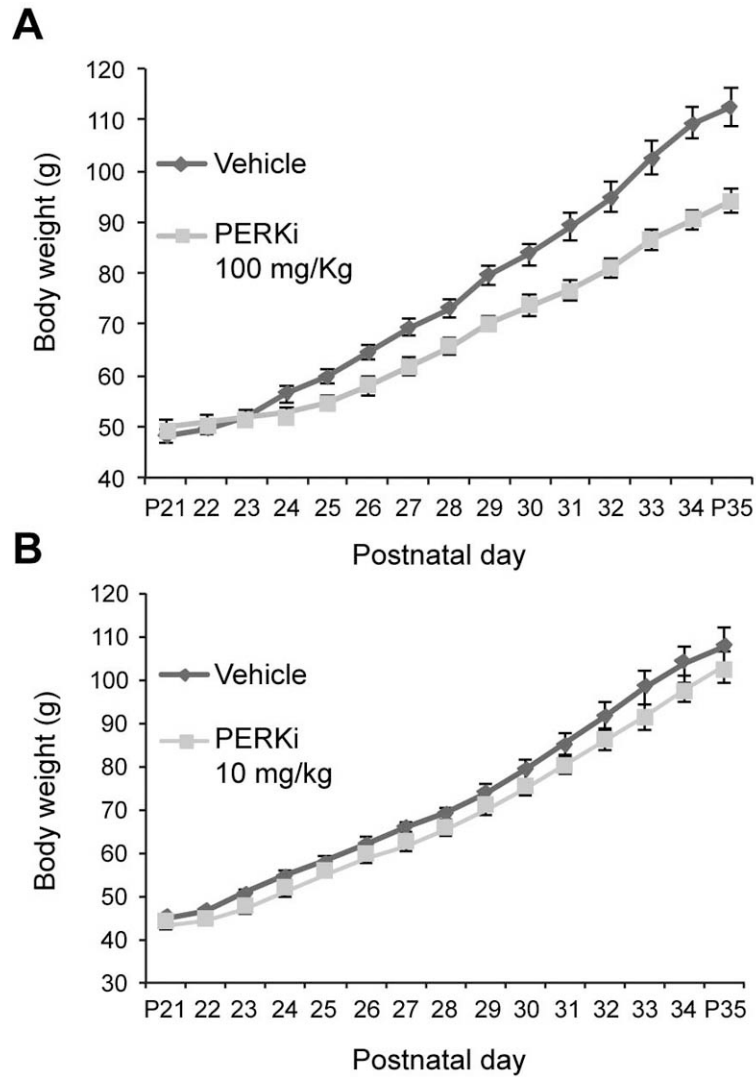

**Figure S2. GSK2606414A reduces age-related body weight gain**

P23H-1 rats were treated from P21-P35 with either (A) 100 mg/kg or (B) 10 mg/kg GSK2606414A (PERKi) or vehicle. GSK2606414A and vehicle were administered daily via oral gavage and rats were monitored daily for any adverse effects and for body-weight gain. (A) The high dose GSK2606414A-treated rats (n=8) had a lower increase in body weight as opposed to the vehicle-treated rats (n=6). (B) The low dose GSK2606414A-treated rats (n=8) also showed a reduced age-related increase in body weight compared to the vehicle-treated rats (n=6).

### IRE1 branch

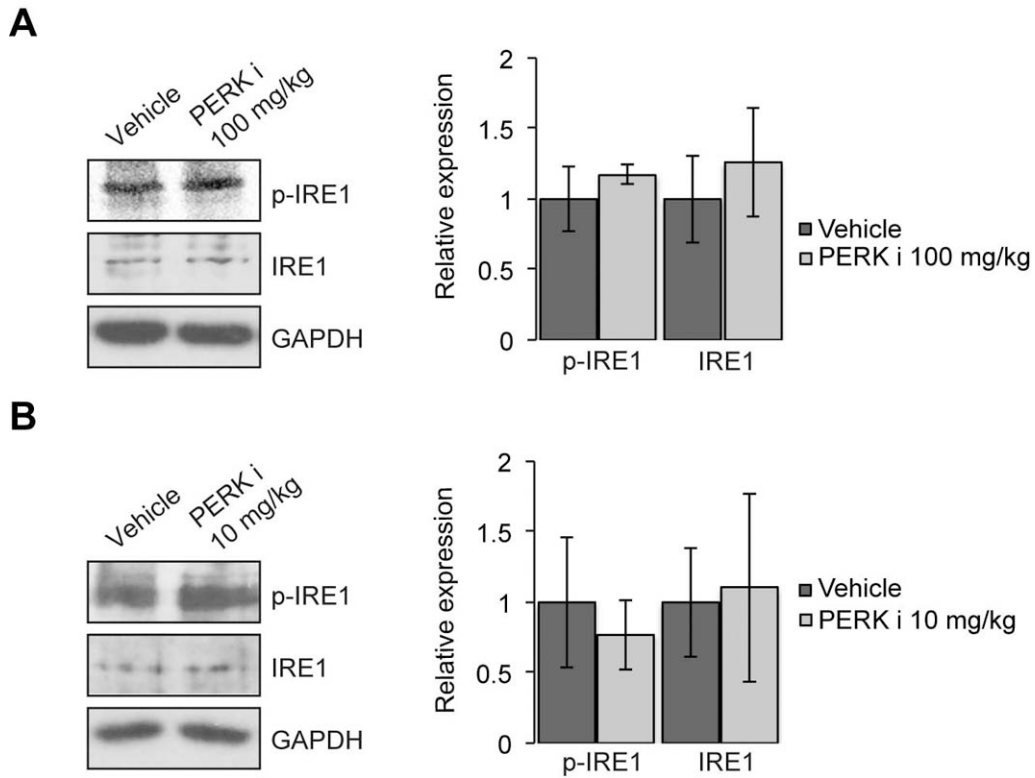

**Figure S3. PERK inhibition does not alter IRE1 in P23H-1 rat retina**

P23H-1 rats were treated from P21-P35 with either GSK2606414A (PERKi) or vehicle. (**A**, **B**) Representative western blot of retina lysates of P36 P23H-1 rats treated with 100 mg/kg (**A**) or 10 mg/kg (**B**) PERKi or vehicle for phosphor-IRE1 (p-IRE1) and IRE1. GAPDH was used as a loading control. Quantification of expression levels of p-IRE1 and IRE1 in P23H-1 rats after treatment with 100 mg/kg (**A**) or 10 mg/kg (**B**) PERKi. Densitometric analysis was used to calculate the levels of these proteins relative to vehicle; values are mean  $\pm$  SEM  $n \geq 3$ .

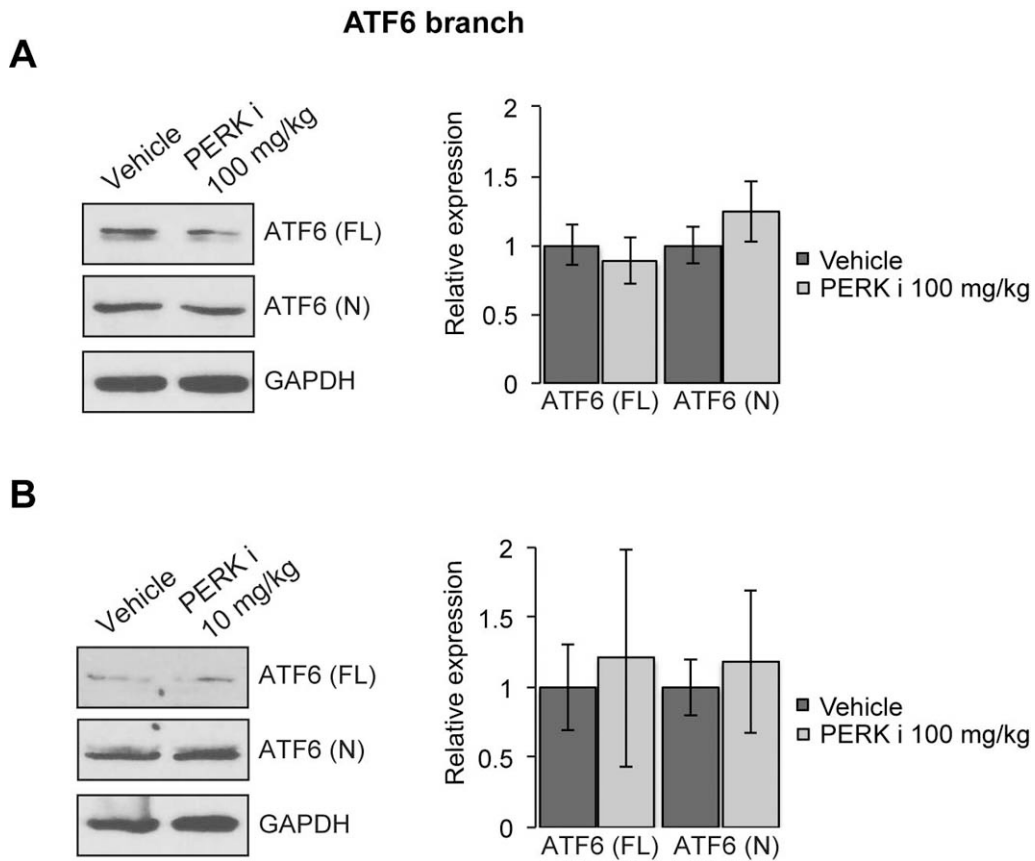

**Figure S4. PERK inhibition does not alter ATF6 in P23H-1 rat retina**

P23H-1 rats were treated from P21-P35 with either GSK2606414A (PERKi) or vehicle. **(A, B)** Representative western blot of retina lysates of P36 P23H-1 rats treated with 100 mg/kg **(A)** or 10 mg/kg **(B)** PERKi or vehicle for full length ATF6 (ATF6 (FL)) and cleaved activated ATF6 (ATF6 (N)). GAPDH was used as a loading control. Quantification of expression levels of ATF6 (FL) and ATF6 (N) in P23H-1 rats after treatment with 100 mg/kg **(A)** or 10 mg/kg **(B)** PERKi. Densitometric analysis was used to calculate the levels of these proteins relative to vehicle; values are mean  $\pm$  SEM  $n \geq 3$ .

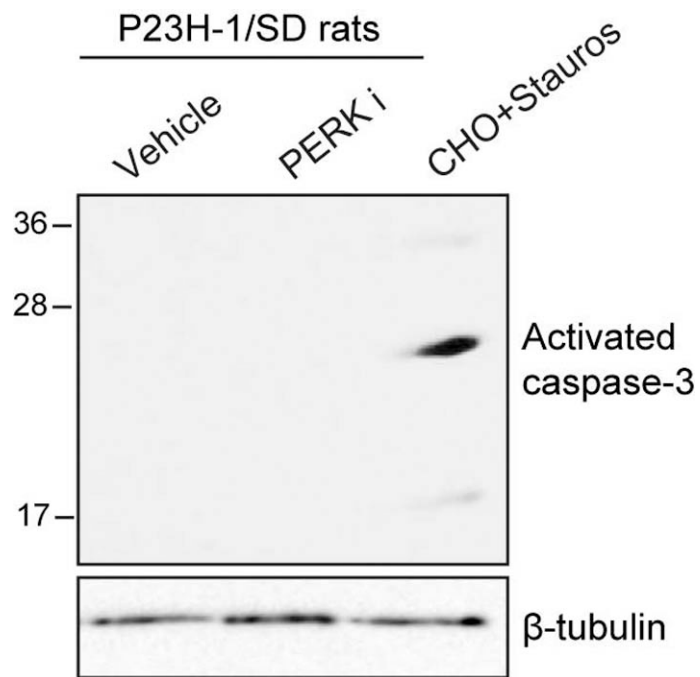

**Figure S5. Lack of detectable activated caspase 3 in P23H-1 rat retina**

P23H-1 rats were treated from P21-P35 with either GSK2606414A (PERKi) or vehicle. Representative immunoblot of retina lysates of P36 P23H-1 rats treated with 100 mg/kg PERKi or vehicle for activated caspase 3. CHO cells treated with staurosporine (Stauros), 1  $\mu$ M for 18 hours, were used as a positive control.  $\beta$ -tubulin was used as a loading control.
